# Supplementary material
Source: PubMed Central journal article supplement (PMC4966908)
Supplement: NIHMS797465-supplement.pdf [file NIHMS797465-supplement.pdf]

# Supporting Information for: Denser sampling may be more effective than repeat experiments for high throughput time series studies

Emre Sefer, Michael Kleyman, and Ziv-Bar Joseph

Computational Biology Department, School of Computer Science, Carnegie Mellon University  
5000 Forbes Avenue, Pittsburgh, PA 15213, USA  
{zivbj}@cs.cmu.edu

Supporting code and datasets: [www.sb.cs.cmu.edu/repeats](http://www.sb.cs.cmu.edu/repeats)

## Supporting Methods

**Estimating Eq. 4 for a step function** Repeating the pairwise comparison in Eq. 5 for all points in  $S_i$  and  $M_i$  returns the following  $i-1$  and  $T-i$  distributions to be satisfied respectively:

$$p\left(\sum_{a=1}^j \sum_{z=1}^{n_r} d_{a:z} \leq n_r \frac{j}{2}\right), \quad j \in 1, \dots, i-1 \quad (9)$$

$$p\left(\sum_{a=i}^{j-1} \sum_{z=1}^{n_r} d_{a:z} \geq n_r \frac{j-i}{2}\right), \quad j \in i+1, \dots, T \quad (10)$$

$d_{a:z}$  terms in Eq. 9 and Eq. 10 are independent of each other, so the probability of selecting  $t_i$  in Eq. 4 can be separated into two integrals as in:

$$p(s_r = t_i^r | c_r = 1, s_g, c_g, \sigma^2) = p(\mathcal{L}(t_i, 1) > \mathcal{L}(t_j, 1), \forall j \neq i) = p(\mathcal{L}(t_i, 1) > \mathcal{L}(t_j, 1), \forall j \in S_i) p(\mathcal{L}(t_i, 1) > \mathcal{L}(t_j, 1), \forall j \in M_i) \quad (11)$$

where  $p(\mathcal{L}(t_i, 1) > \mathcal{L}(t_j, 1), \forall j \in S_i)$  is the probability of the likelihood defined by  $t_i$  being higher than the likelihood of all other points that are smaller than  $t_i$ .  $d_{a:z}$  variables for each time point  $t_a$  in  $S_i$  have acyclic dependencies between them,  $d_{a:z}$  variables depend only on the variables of time points between  $t_a$  and  $t_{i-1}$ . Due to the existence of this ordering between variables,  $p(\mathcal{L}(t_i, 1) > \mathcal{L}(t_j, 1), \forall j \in S_i)$  can be expressed by the following nested integral:

$$p(\mathcal{L}(t_i, 1) > \mathcal{L}(t_j, 1), \forall j \in S_i) = \int_{-\infty}^{\frac{n_r}{2}} p(\hat{d}_{i-1} | m_{i-1}^i, \sigma_{i-1}^i) \int_{-\infty}^{n_r - \hat{d}_{i-1}} p(\hat{d}_{i-2} | m_{i-2}^{i-1}, \sigma_{i-2}^{i-1}) \dots \int_{-\infty}^{n_r \frac{i-1}{2} - \sum_{t=2}^{i-1} \hat{d}_t} p(\hat{d}_1 | m_1^2, \sigma_1^2) d_{\hat{d}_1} \dots d_{\hat{d}_{i-2}} d_{\hat{d}_{i-1}} \quad (12)$$

where  $\hat{d}_{i-1} = \sum_{z=1}^{n_r} d_{i-1:z}$  is a variable for summation of all repeats for the  $i-1$ 'th time point. Each  $\hat{d}_j$  is distributed gaussian with mean  $m_j^{j+1} = n_r \sum_{m=j, t_m \geq s_g}^j 1$  and standard deviation  $\sigma_j^{j+1} = \sigma \sqrt{n_r}$ . The gaussians are independent of each other over interval  $[-\infty, \frac{n_r}{2}]$ , so this becomes:

$$p(\mathcal{L}(t_i, 1) > \mathcal{L}(t_j, 1), \forall j \in S_i) = A + \int_{-\infty}^{\frac{n_r}{2}} p(\hat{d}_{i-1}) \int_{\frac{n_r}{2}}^{n_r - \hat{d}_{i-1}} p(\hat{d}_{i-2}) \dots \int_{\frac{n_r}{2}}^{n_r \frac{i-1}{2} - \sum_{t=2}^{i-1} \hat{d}_t} p(\hat{d}_1) d_{\hat{d}_1} \dots d_{\hat{d}_{i-2}} d_{\hat{d}_{i-1}} \quad (13)$$

where  $A = \prod_{j \in S_i} \Phi(\frac{n_r}{2}, m_j^{j+1}, \sigma_j^{j+1})$ . Eq. 13 can be efficiently estimated by Gaussian quadrature or by MCMC [1]. We use similar derivation to estimate  $p(\mathcal{L}(t_i, 1) > \mathcal{L}(t_j, 1), \forall j \in M_i)$ . For large  $T^d$ , exact estimation of nested multidimensional integral in Eq. 11 can be complicated so we instead estimate its upper and lower bounds as below.

**Estimating upper and lower bounds** Exact estimation of nested multidimensional integral in Eq. 11 can be complicated for large  $T^d$ . In this case, we can rather estimate its lower and upper bounds quite efficiently.  $\prod_{j \neq i} p(\mathcal{L}(t_i, 1) > \mathcal{L}(t_j, 1))$  gives a lower bound estimate since these pairwise terms are not originally independent. We can estimate an upper bound of  $p(\mathcal{L}(t_i, 1) > \mathcal{L}(t_j, 1), \forall j \in S_i)$  as follows: Let  $D(n)$  be upper bound of the integral defined only by the topmost  $n$  equations in (9). By approximating the multi-dimensional integral symmetrically, upper bound can be estimated recursively by:

$$D(n+1) = D(n) \left(1 - \frac{1}{n+1} (1 - A_{i-n-1:i-n})\right) \quad (14)$$

with base case  $D(1) = A_{i-1:i} = \Phi(\frac{n_r}{2}, m_{i-1}^i, \sigma_{i-1}^i)$ , and its upper bound is given by  $D(i-1) = \frac{\prod_{j=1}^{i-1} (A_{j:j+1+i-1})}{(i-2)!}$ . Similarly, upper bound of  $p(\mathcal{L}(t_i, 1) > \mathcal{L}(t_j, 1), \forall j \in M_i)$  can be estimated by:

$$U(n+1) = U(n) \left(1 - \frac{A_{i+n:i+n+1}}{n+2-i}\right) \quad (15)$$

where  $U(n)$  is upper bound of the integral defined only by the topmost  $n-i+1$  equations in (10), and base case is  $U(i) = 1 - A_{i:i+1} = 1 - \Phi(\frac{n_r}{2}, m_i^{i+1}, \sigma_i^{i+1})$ . Solution of this recursion

is  $U(T-1) = \frac{\prod_{j=i}^{T-1} (j-i+1 - A_{j:j+1})}{(T-i)!}$ . Let  $I^d$  be the vector points in  $T^d$  ordered by their absolute distance from  $s_g$ . Once upper bound of Eq. 11 is estimated, we can estimate the corresponding lower bound of  $E(f_{\text{mis}})$  by Algorithm 1. Upper bound of  $E(f_{\text{mis}})$  can be estimated similarly by the same algorithm where we use lower bound of Eq. 11 instead of its upper bound estimation in Lines 5 – 9.

---

**Algorithm 1** Table 1 related to Methods: An algorithm for computing a lower bound for  $E(f_{\text{mis}})$ .

---

```

1:  $r = 1, d = 0$  { $r$  is the remaining probability mass,  $d$  is the expected distance}
2: Let  $I$  be an ordering of the points in  $T$  w.r.t. their distance from  $s_g$ 
3: while  $I \neq \emptyset$  do
4:    $t_i \leftarrow$  first point in  $I$ ;  $I = I \setminus t_i$ 
5:    $lb_i = 1$ 
6:   for  $t_j \in I$  do
7:      $c_j = P(\mathcal{L}(t_i, 1) > \mathcal{L}(t_j, 1))$ 
8:      $lb_i = lb_i c_j$ 
9:   end for
10:   $d = d + r lb_i (|t_i - s_g|)$ 
11:   $r = r(1 - lb_i)$ 
12: end while
13: return  $d$ 

```

---

## Supporting Figure

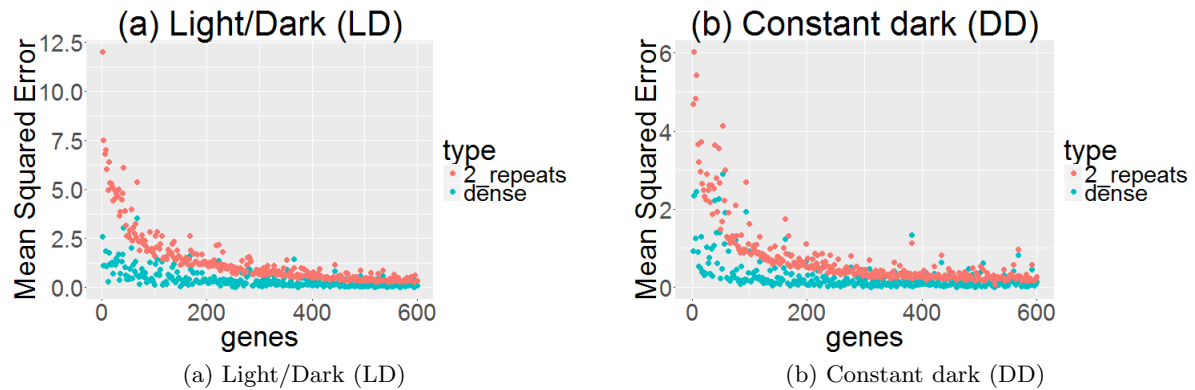

Figure S1, related to Figure 4: Using piecewise linear curves to compare sampling strategies over all genes exhibiting circadian and diel rhythms. Genes sorted by absolute MSE difference between *Dense* and *Repeat*<sub>2</sub> when using 8 experiments over LD and DD data respectively. Similar to Figure 7 which performs the same comparison using splines we see that *Dense* generally greatly outperforms *Repeat* on this data.

## Data S1. Software Source Code, Related to Experimental Procedures

### References

1. Press, W.H.: Numerical recipes 3rd edition: The art of scientific computing. Cambridge university press (2007)
